# Supplementary material for: An Exploration of Behavioral Intention towards Participation in Sustainable Tourism Activities: A Response to the Coming of Smart Technology
Source: Research Square preprint supplement (doi:10.21203/rs.3.rs-7492880/v1), 2025-10-08
Supplement: Supplementary file 1 [file 46d7930a05e8ee4280726e9f.docx]

Table 1: Reliability and validity test of the measurement model

| Latent Variable | CA | rho_A | CR | AVE |
| --- | --- | --- | --- | --- |
| Information Technology Application | 0.878 | 0.891 | 0.925 | 0.804 |
| Risk Perception | 0.890 | 0.892 | 0.919 | 0.695 |
| Cognitive Image | 0.730 | 0.836 | 0.830 | 0.623 |
| Marketing Strategy | 0.901 | 0.924 | 0.923 | 0.635 |
| Cognitive Benefit | 0.810 | 0.811 | 0.887 | 0.724 |
| Behavioral Intention of Sustainable Tourism | 0.825 | 0.831 | 0.885 | 0.658 |

CA: Cronbach's Alpha; rho_A: rho_A reliability coefficient; CR: Composite Reliability; AVE: Average Variance Extracted
