# Supplementary material for: An Exploration of Behavioral Intention towards Participation in Sustainable Tourism Activities: A Response to the Coming of Smart Technology
Source: Research Square preprint supplement (doi:10.21203/rs.3.rs-7492880/v1), 2025-10-08
Supplement: Supplementary file 2 [file 4c2e8c432494d079037b4667.docx]

Table 2: Correlation coefficient matrix of research variables

| Latent Variable | ITA | RP | CI | MS | CB | BIST |
| --- | --- | --- | --- | --- | --- | --- |
| Information Technology Application, ITA | 0.897 |  |  |  |  |  |
| Risk Perception, RP | 0.593 | 0.834 |  |  |  |  |
| Cognitive Image, CI | 0.447 | 0.431 | 0.790 |  |  |  |
| Marketing Strategy, MS | 0.758 | 0.718 | 0.568 | 0.797 |  |  |
| Cognitive Benefit, CB | 0.719 | 0.704 | 0.495 | 0.821 | 0.851 |  |
| Behavioral Intention of Sustainable Tourism, BIST | 0.641 | 0.501 | 0.351 | 0.556 | 0.680 | 0.811 |
